# Supplementary material for: Amphiphilic Acrylic Nanoparticles Containing the Poloxamer Star Bayfit® 10WF15 as Ophthalmic Drug Carriers
Source: PubMed Central journal article supplement (PMC6680529; doi:10.3390/polym11071213), 2019-07-19
Supplement: polymers-11-01213-s001.pdf [file polymers-11-01213-s001.pdf]

## Amphiphilic acrylic nanoparticles containing the poloxamer star Bayfit® 10WF15 as ophthalmic drug carriers.

Miguel Gómez-Ballesteros, Vanessa Andrés-Guerrero, Francisco Jesús Parra, Jorge Marinich, Beatriz de-las-Heras, Irene Teresa Molina-Martínez, Blanca Vázquez-Lasa, Julio San Román and Rocío Herrero-Vanrell.

### Supporting tables

**Table S1.** *In vivo* tolerance grading system for macroscopically evaluated signs.

| Grade | Discomfort                                      | Cornea          | Conjunctiva                                | Discharge                             | Lids             |
|-------|-------------------------------------------------|-----------------|--------------------------------------------|---------------------------------------|------------------|
| 0     | No reaction                                     | No alterations  | No alterations                             | No discharge                          | No swelling      |
| 1     | Blinking                                        | Mild opacity    | Mild hyperemia/mild edema                  | Mild discharge without moistened hair | Mild swelling    |
| 2     | Enhanced blinking/intense tearing/vocalizations | Intense opacity | Intense hyperemia/intense edema/hemorrhage | Intense discharge with moistened hair | Obvious swelling |

**Table S2.** Linear regression parameters of the HPLC-UV method employed for the quantitation of acetazolamide. The method was validated with respect to linearity, accuracy and reliability in the range of concentrations between 1 and 10 µg/mL.

|                                                | Series 1        | Series 2        | Series 3        |
|------------------------------------------------|-----------------|-----------------|-----------------|
| Slope                                          | 165871          | 150899          | 163913          |
| Intercept                                      | 3845,7          | 6650,9          | -340,5          |
| Coefficient of determination (r <sup>2</sup> ) | 0,998           | 0,999           | 0,993           |
| Intercept                                      | p=0,852<br>N.S. | p=0,209<br>N.S. | p=0,973<br>N.S. |
| Slope                                          | p<0,001<br>A.S. | p<0,001<br>A.S. | p<0,001<br>A.S. |
